# Supplementary material for: DAP derived fatty acid amide organogelators as novel carrier for drug incorporation and pH-responsive release
Source: Royal Society of Chemistry journal article supplement (doi:10.1039/d0nj04611f), 2020-11-26
Supplement: d0nj04611f1.pdf [file d0nj04611f1.pdf]

## Electronic Supplementary Information (ESI)

---

### **DAP derived fatty acid amide organogelators as novel carrier for drug incorporation and pH-responsive release**

Eqvinshi Yadav, Anil Kumar Khatana, Sharol Sebastian and Manoj K. Gupta\*

Department of Chemistry, School of Basic Sciences, Central University of Haryana,  
Mahendergarh-123 031, Haryana, India

\*Corresponding Author Name: Manoj K. Gupta

Mobile: +91-9728739075

E-mail address: mkgupta@cuh.ac.in

| <b>CONTENTS</b>                                                                          | <b>PAGE NO.</b> |
|------------------------------------------------------------------------------------------|-----------------|
| <sup>1</sup> H NMR Spectrum of compound <b>16DAP</b>                                     | S3              |
| <sup>13</sup> C NMR Spectrum of compound <b>16DAP</b>                                    | S3              |
| <sup>1</sup> H NMR Spectrum of compound <b>12DAP</b>                                     | S4              |
| <sup>13</sup> C NMR Spectrum of compound <b>12DAP</b>                                    | S4              |
| <sup>1</sup> H NMR Spectrum of compound <b>18UDAP</b>                                    | S5              |
| <sup>13</sup> C NMR Spectrum of compound <b>18UDAP</b>                                   | S5              |
| <sup>1</sup> H NMR Spectrum of compound <b>20DAP</b>                                     | S6              |
| <sup>13</sup> C NMR Spectrum of compound <b>20DAP</b>                                    | S6              |
| <sup>1</sup> H NMR Spectrum of compound <b>22DAP</b>                                     | S7              |
| <sup>13</sup> C NMR Spectrum of compound <b>22DAP</b>                                    | S7              |
| UV spectra of kinetic degradation of drug ( <b>22DAP</b> ) composite organogel at pH 5.5 | S8              |
| UV spectra of kinetic degradation of drug ( <b>22DAP</b> ) composite organogel at pH 7.4 | S8              |

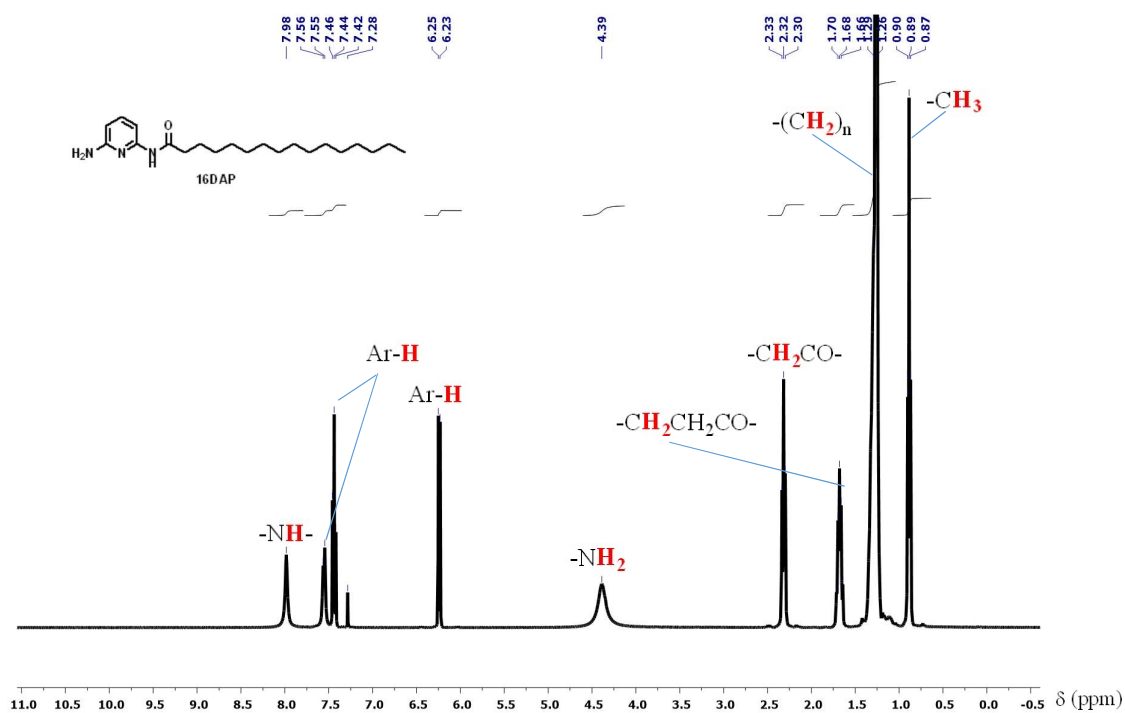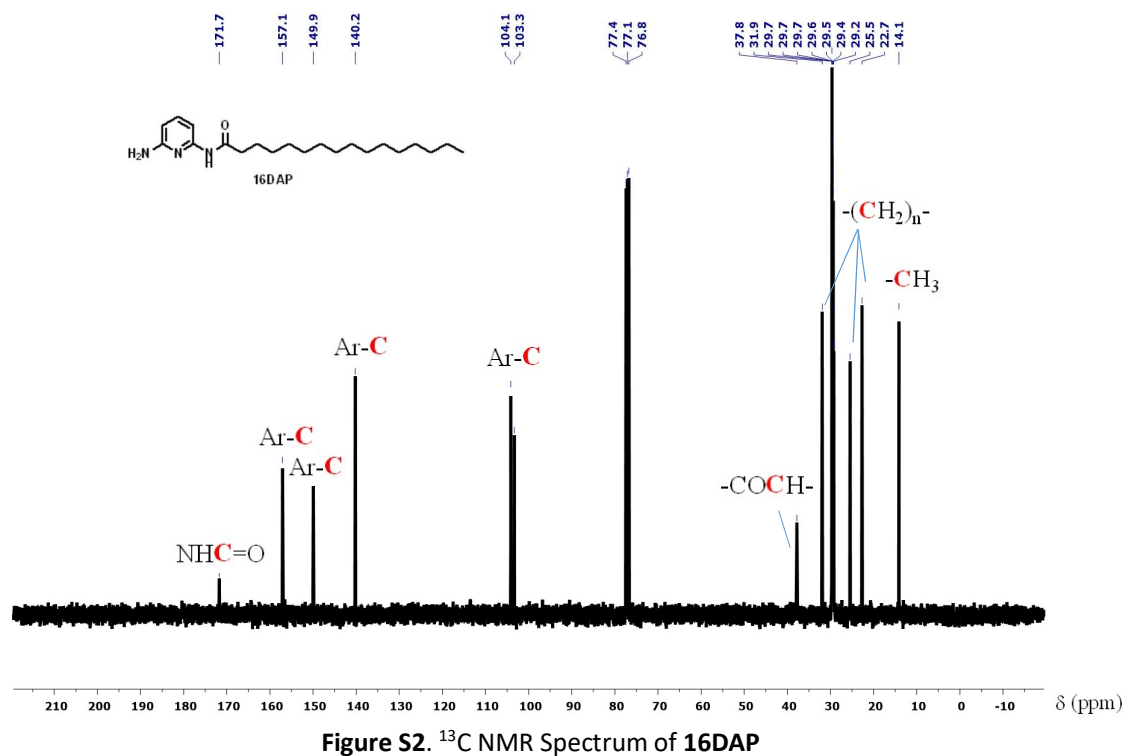

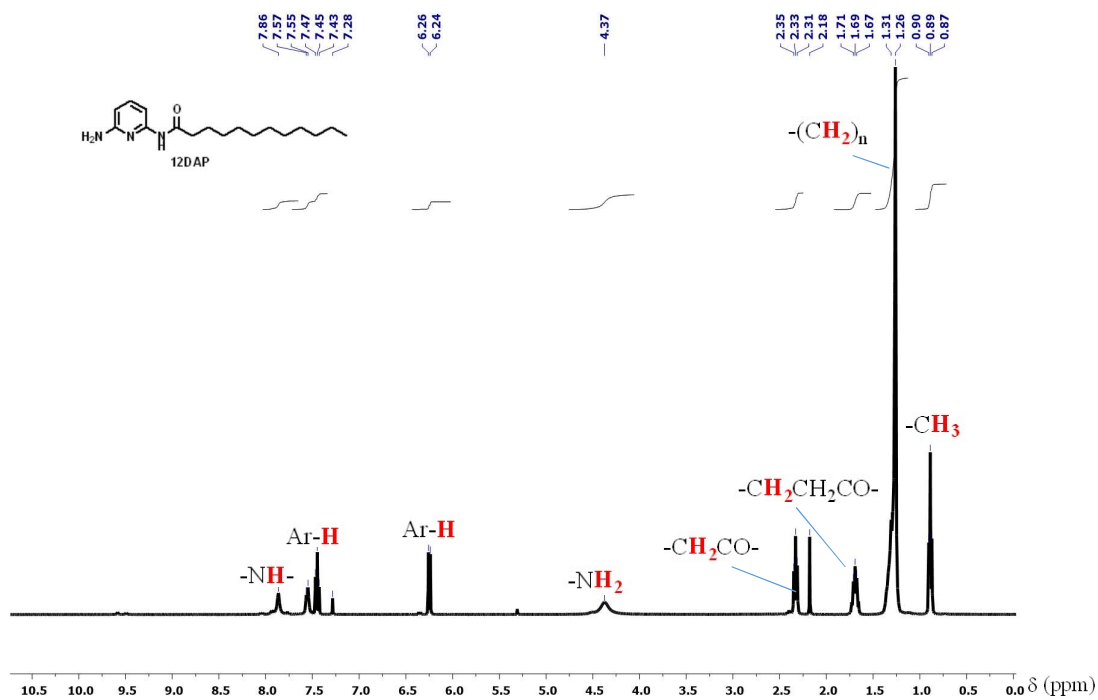

Figure S3.  $^1\text{H NMR}$  Spectrum of 12DAP

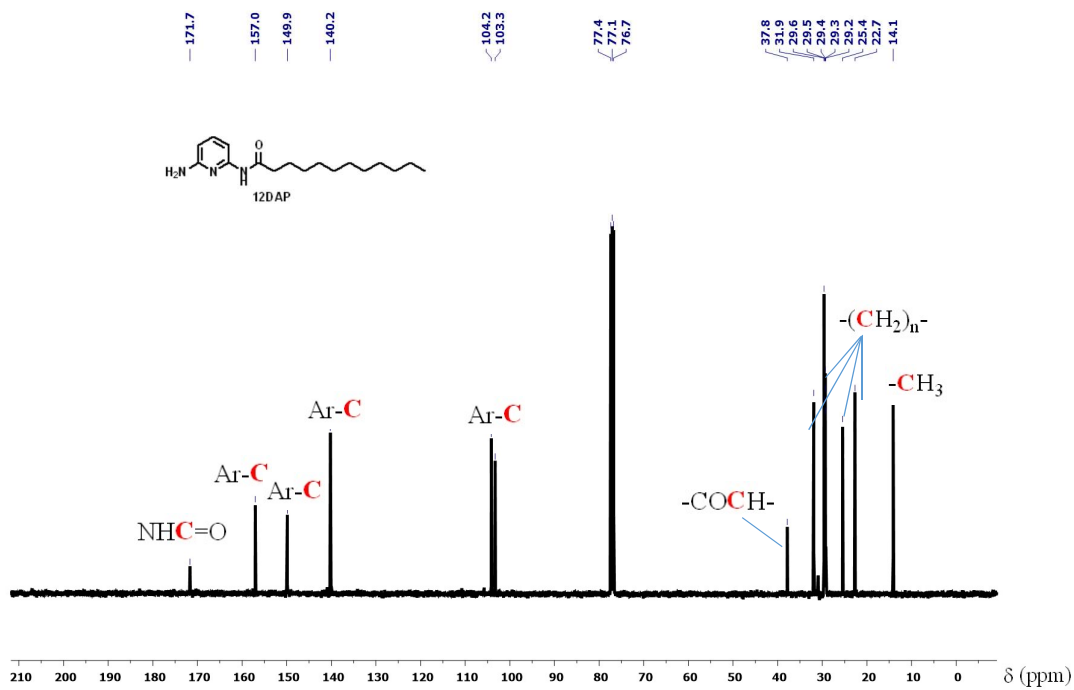

Figure S4.  $^{13}\text{C NMR}$  Spectrum of 12DAP

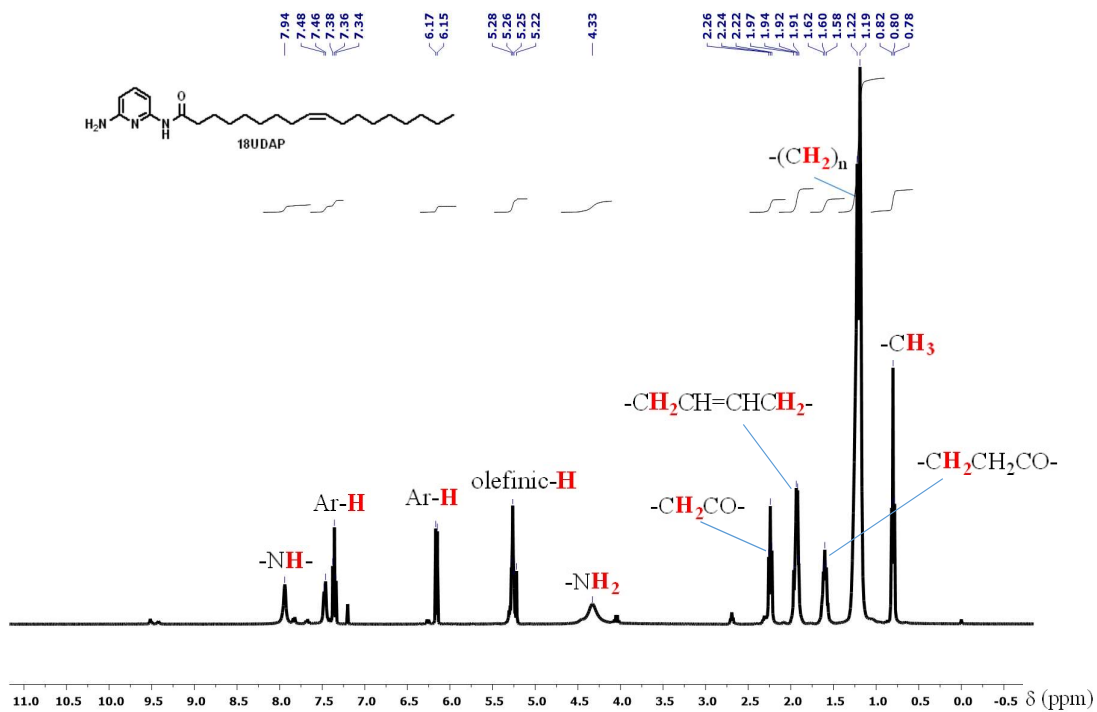

Figure S5.  $^1\text{H}$  NMR Spectrum of 18UDAP

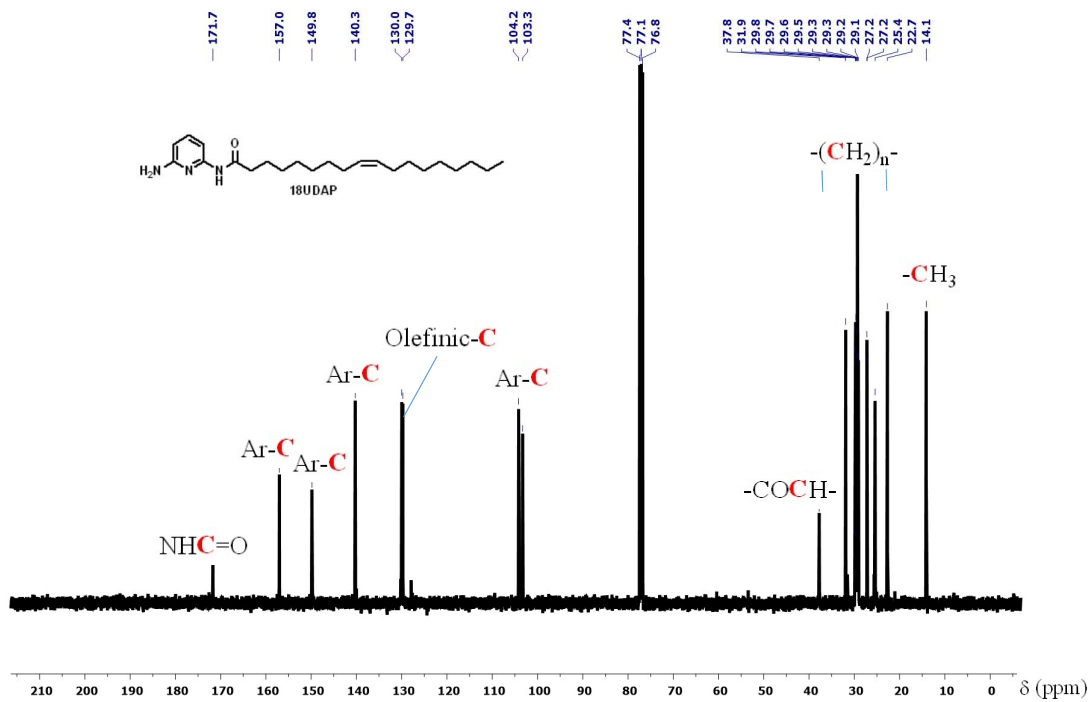

Figure S6.  $^{13}\text{C}$  NMR Spectrum of 18UDAP

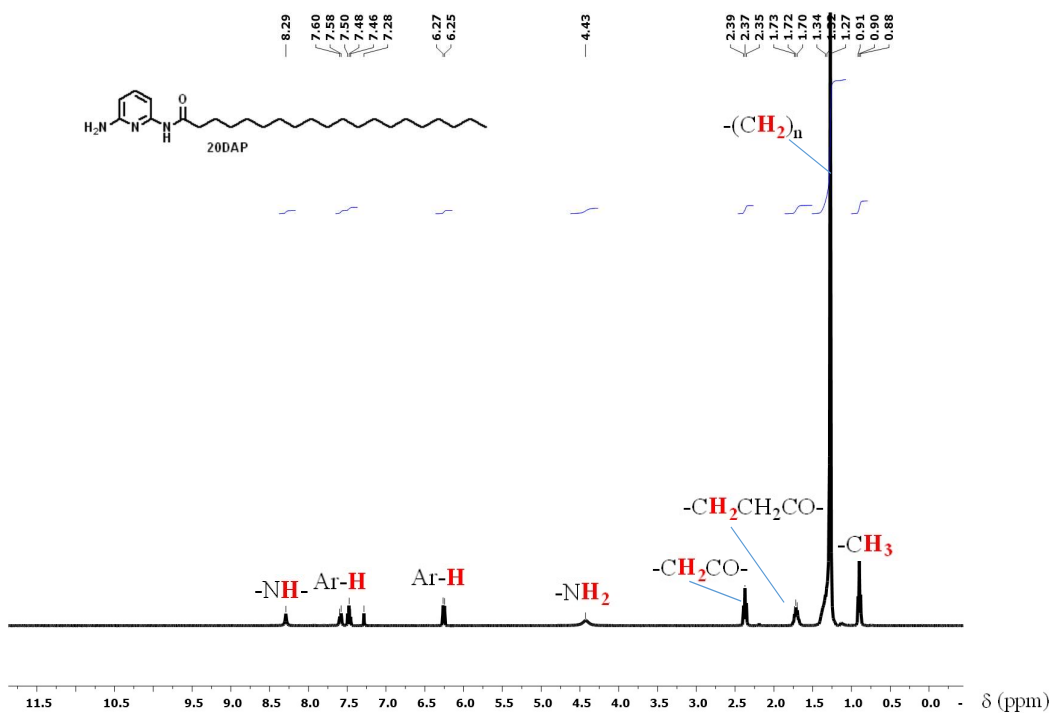

Figure S7.  $^1\text{H}$  NMR Spectrum of 20DAP

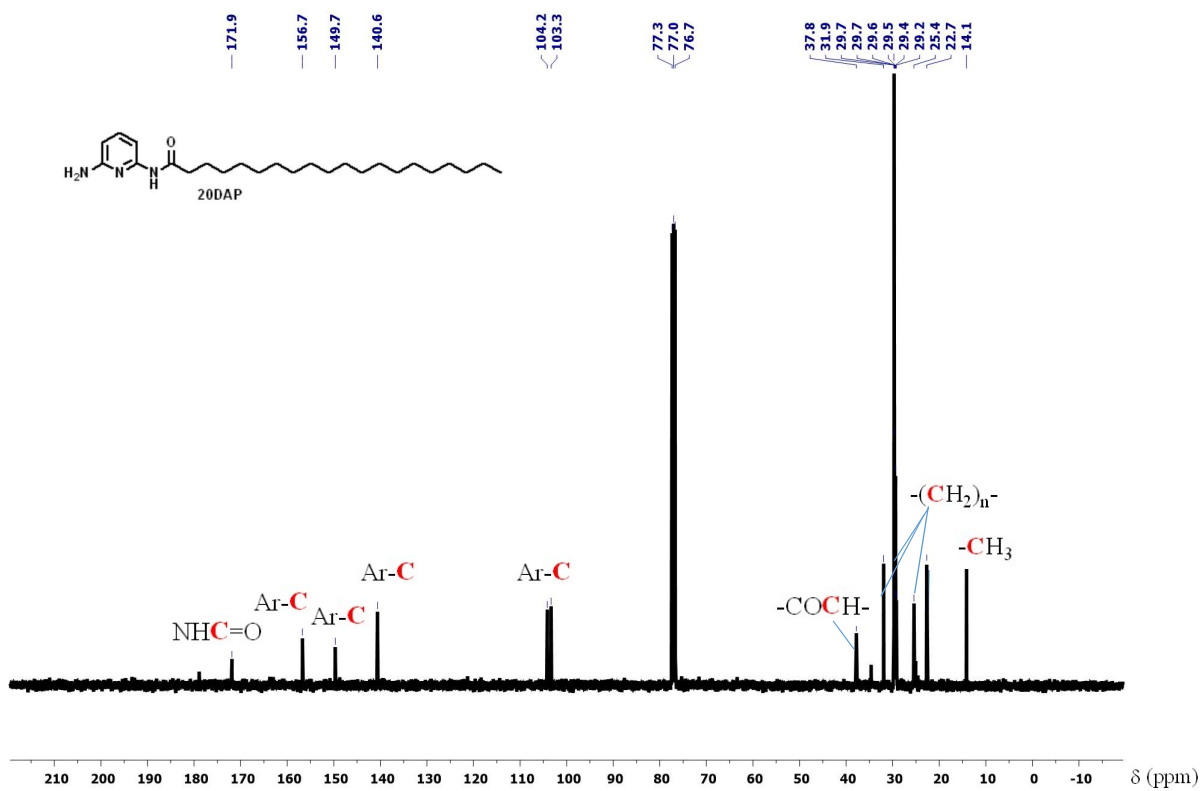

Figure S8.  $^{13}\text{C}$  NMR Spectrum of 20DAP

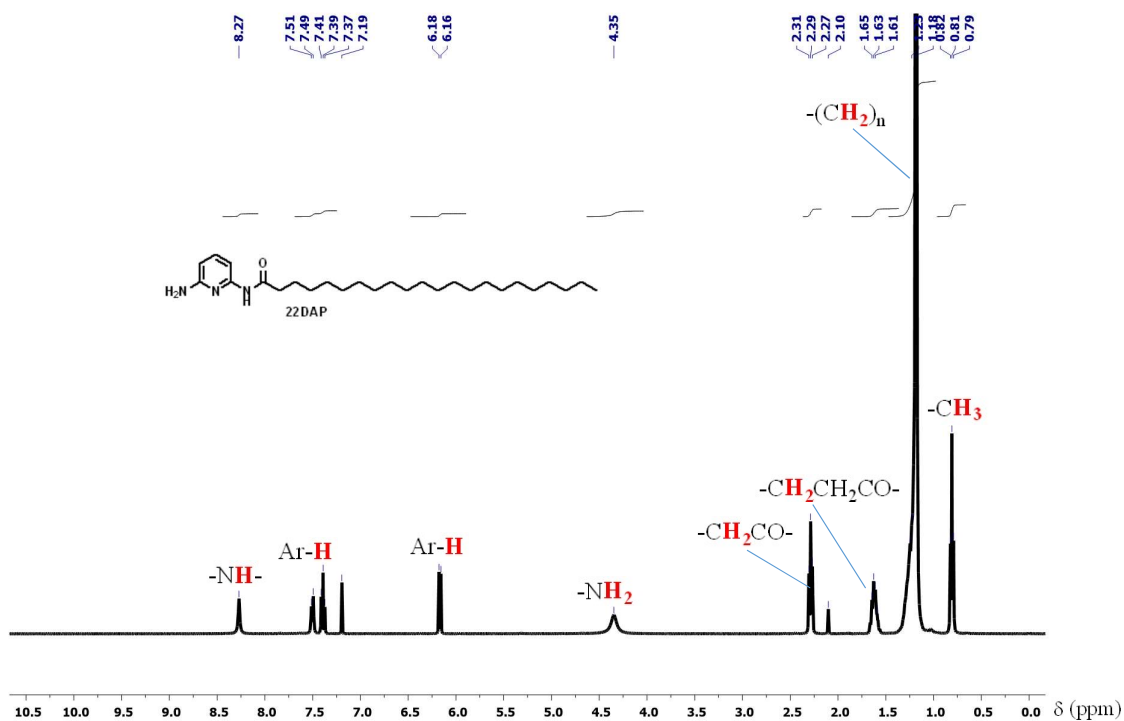

Figure S9.  $^1\text{H NMR}$  Spectrum of 22DAP

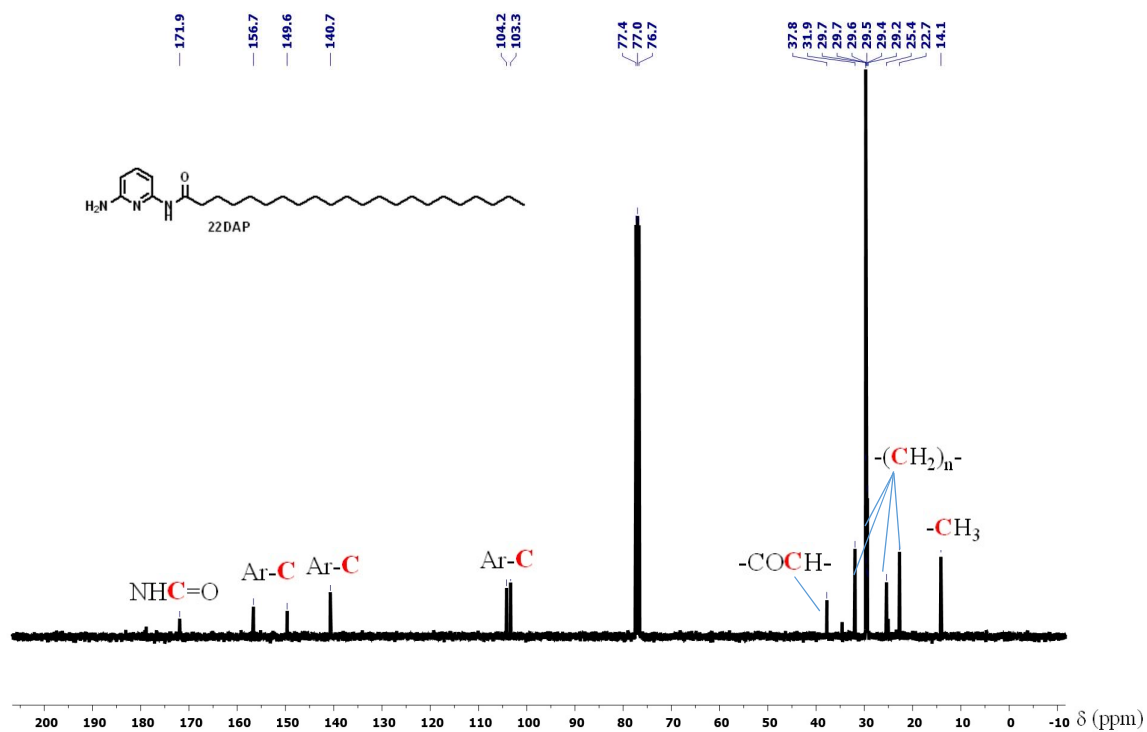

Figure S10.  $^{13}\text{C NMR}$  Spectrum of 22DAP

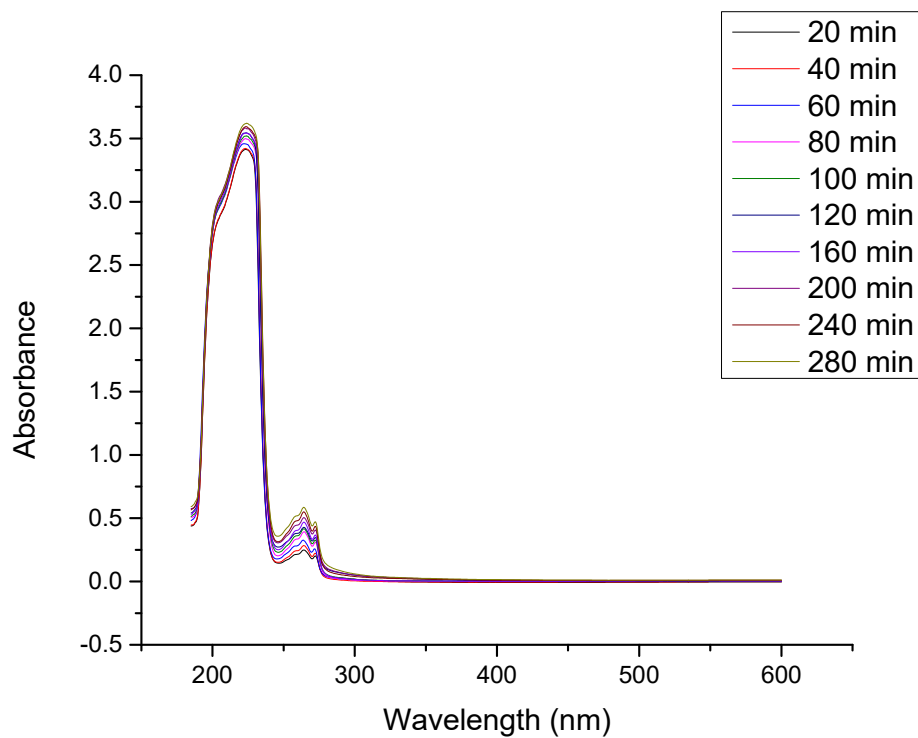

**Figure S11.** UV spectra of kinetic degradation of drug (**22DAP**) composite organogel at pH 5.5

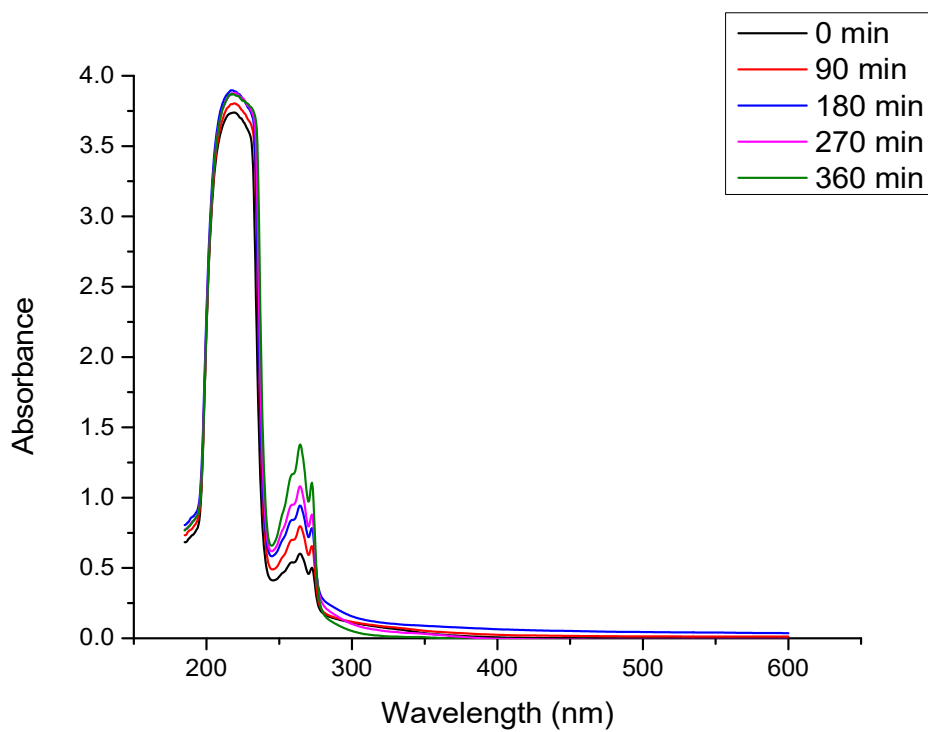

**Figure S12.** UV spectra of kinetic degradation of drug (**22DAP**) composite organogel at pH 7.4
